# Supplementary material for: Two-dimensional transition metal dichalcogenides as metal sources of metal–organic frameworks
Source: Royal Society of Chemistry journal article supplement (doi:10.1039/c8cc01258j), 2018-01-01
Supplement: c8cc01258j1.pdf [file c8cc01258j1.pdf]

## Electronic Supporting Information (ESI)

# Two-dimensional transition metal dichalcogenides as metal source of metal-organic frameworks

## Table of Contents

- SI-1 Experimental section
- SI-2 Elemental analysis
- SI-3 Further information obtained from Ar adsorption/desorption isotherm of NH<sub>2</sub>-MIL-125(Ti)
- SI-4 Diffusion reflectance analysis
- SI-5 FT-IR spectra of prepared NH<sub>2</sub>-MIL-125(Ti) powders
- SI-6 Investigation of the influence of synthetic temperature and duration on final morphology of NH<sub>2</sub>-MIL-125(Ti)
- SI-7 Crystal structures and information of bond length
- SI-8 Calculation methods of formation energies
- SI-9 SEM and XRD characterization of prepared MIL-167 powders

## SI-1 Experimental Section

### Characterization.

Powder X-ray diffraction (XRD) patterns were recorded on a Rigaku SmartLab diffractometer with Cu K<sub>a</sub> radiation ( $\lambda = 0.15418$  nm). Morphologies of solid samples were characterized with a field-emission scanning electron microscope (NOVA NanoSEM 450). Ar adsorption/desorption isotherms were recorded at 87 K on a Quantachrom Autosorb-iQ instrument. Prior to measurement, samples were outgassed at 130 °C overnight. Diffuse reflectance UV-Vis spectroscopy (DR/UV-Vis) experiments were conducted with a JASCO 550 spectrophotometer. FT-IR spectra were recorded using an EQUINOX55 Fourier transform infrared spectrometer (Bruker, Germany) by means of KBr pellet technique. A Tecnai G2 Spirit (FEI Co.) operated at 120kV was used for general microstructure inspection. High resolution transmission electron microscopy (HRTEM) characterization of the microstructure was carried out on a JEM-2100 (JEOL Co.) operated at 200kV. To prepare samples for TEM analysis, dispersion of samples were coated on carbon-coated copper grid (200 mesh, Zhongjingkeyi Co.) and dried in air. Nonmetallic elemental analysis was carried out with a Vario EL III Elemental Analyzer. Metallic elemental analysis was conducted by Inductively Coupled Plasma (ICP) over a Perkin Elmer OPTIMA 2000DV apparatus.

**Synthesis of NH<sub>2</sub>-MIL-125(Ti):** 2.24 g of NH<sub>2</sub>-BDC (99%, Alfa Aesar) and 0.056 g TiS<sub>2</sub> (99.9%, Sigma-Aldrich) were dissolved in a solution containing 27 ml DMF (99.8%, Shanghai Chemical Reagent Inc.) and 3 ml dry MeOH (99.5%, Shanghai Chemical Reagent Inc.) with stirring. The mixture was then transferred to a 50 ml Teflon-lined autoclave and solvothermally treated at 160 °C under static condition for 96 h. After cooling down, the solid product was centrifuged, washed with DMF and methanol and finally dried in an oven at 60 °C overnight.

**Synthesis of NH<sub>2</sub>-MIL-125(Ti) under reflux:** 2.24 g of NH<sub>2</sub>-BDC (99%, Alfa Aesar) and 0.056 g TiS<sub>2</sub> (99.9%, Sigma-Aldrich) were dissolved in a solution containing 27 ml DMF (99.8%, Shanghai Chemical Reagent Inc.) and 3 ml dry MeOH (99.5%, Shanghai Chemical Reagent Inc.) with stirring. The mixture was then transferred to a 250 ml round bottom flask fitted with a reflux condenser and solvothermally treated at 160 °C for 48 h with stirring. After cooling down, the solid product was centrifuged, washed with DMF and methanol and finally dried in an oven at 60 °C overnight.

**Synthesis of MIL-167:** A precursor solution composed of 1.585 g of H<sub>4</sub>DOBDC (98%, Macklin) and 0.028 g of TiS<sub>2</sub> dispersed in 4.4 ml of DMF and methanol mixture (v:v=1:1) was heated at 180 °C for 24 h in a 25 ml Teflon-lined autoclave. Obtained product was then washed with copious of acetonitrile. Finally, the product was centrifuged and repeatedly washed with DEF before drying under vacuum.

**Photocatalytic Rhodamine B degradation:** 20 mg of the NH<sub>2</sub>-MIL-125(Ti) was dispersed in 50 ml aqueous solution of RhB (95%, Sigma-Aldrich) (concentration: 100 mg L<sup>-1</sup>). The suspension was then stirred for 1 h in the dark to allow equilibrium adsorption of dye molecules. Consequently the dispersion was irradiated under a 500 W Xe arc lamp with a 420 nm cut off filter as the light source. 0.22  $\mu$ l aliquots of dispersion irradiated at different times were taken out and analyzed with UV-Vis light spectrometry to determine the concentration of RhB molecules as a function of irradiation time.

## SI-2 Elemental analysis

**Table S1** Element analysis of NH<sub>2</sub>-MIL-125(Ti) (24:1-160-96h) crystals. .

| <b>Element</b> | <b>Content (%)</b> |
|----------------|--------------------|
| Ti             | 19.2 <sup>a</sup>  |
| C              | 35.4 <sup>b</sup>  |
| N              | 8.1 <sup>b</sup>   |
| H              | 4.3 <sup>b</sup>   |

<sup>a</sup>Metal element content of sample was measured by ICP <sup>b</sup>C, N, H element content were measured by Vario EL III Elemental Analyzer

### SI-3 Further information obtained from Ar adsorption/desorption isotherm of NH<sub>2</sub>-MIL-125(Ti)

**Table S2** Sorption data of NH<sub>2</sub>-MIL-125(Ti) (24:1-160-96h) crystals.

|              | $S_{\text{BET}}$ (m <sup>2</sup> g <sup>-1</sup> ) <sup>a</sup> | $V_{\text{micro}}$ (cm <sup>3</sup> g <sup>-1</sup> ) <sup>b</sup> | $V_{\text{total}}$ (cm <sup>3</sup> g <sup>-1</sup> ) <sup>c</sup> | $V_{\text{micro}}/V_{\text{total}}$ |
|--------------|-----------------------------------------------------------------|--------------------------------------------------------------------|--------------------------------------------------------------------|-------------------------------------|
| 24:1-160-96h | 911.8                                                           | 0.34                                                               | 0.47                                                               | 0.72                                |

<sup>a</sup>Surface area calculated with BET model. <sup>b</sup>Pore size distribution and total pore volume were calculated with NLDFT model. <sup>c</sup>Micropore volume was calculated with SF model.

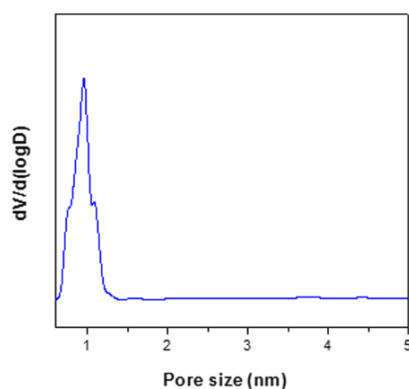

**Fig. S1** Pore size distribution of NH<sub>2</sub>-MIL-125 (24:1-160-96h). The pore size distribution was determined by non-local density functional theory (NLDFT).

**Table S3** Sorption data of NH<sub>2</sub>-MIL-125(Ti) (24:1-160-48h under reflux) crystals.

|              | $S_{\text{BET}}$ (m <sup>2</sup> g <sup>-1</sup> ) <sup>a</sup> | $V_{\text{micro}}$ (cm <sup>3</sup> g <sup>-1</sup> ) <sup>b</sup> | $V_{\text{total}}$ (cm <sup>3</sup> g <sup>-1</sup> ) <sup>c</sup> | $V_{\text{micro}}/V_{\text{total}}$ |
|--------------|-----------------------------------------------------------------|--------------------------------------------------------------------|--------------------------------------------------------------------|-------------------------------------|
| 24:1-160-48h | 1082.6                                                          | 0.40                                                               | 0.47                                                               | 0.85                                |

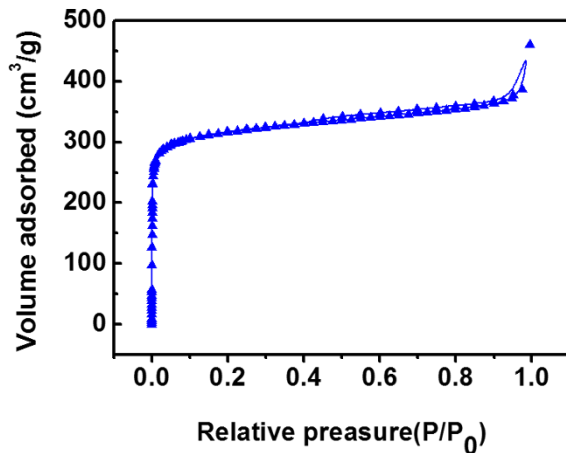

**Fig. S2** Ar adsorption/desorption isotherm of NH<sub>2</sub>-MIL-125(Ti) synthesized under reflux.

## SI-4 Diffusion reflectance analysis

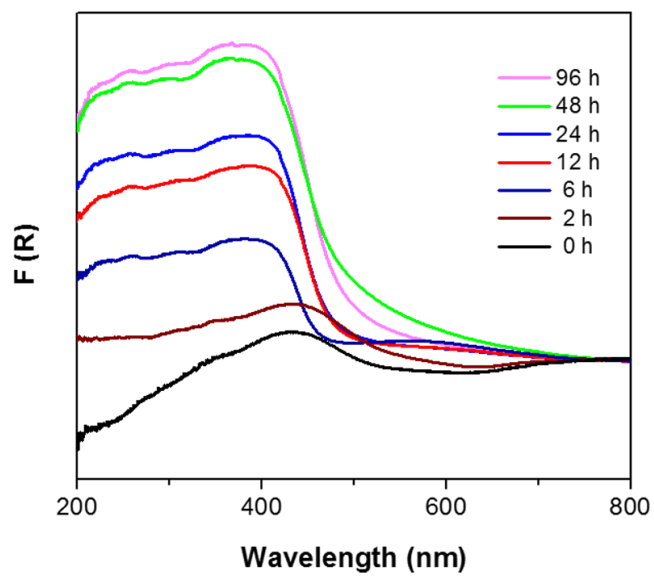

**Fig. S3** Diffusion reflectance spectra of solid products obtained at 160 °C for different reaction times.

## SI-5 FT-IR spectra of prepared NH<sub>2</sub>-MIL-125(Ti) powders

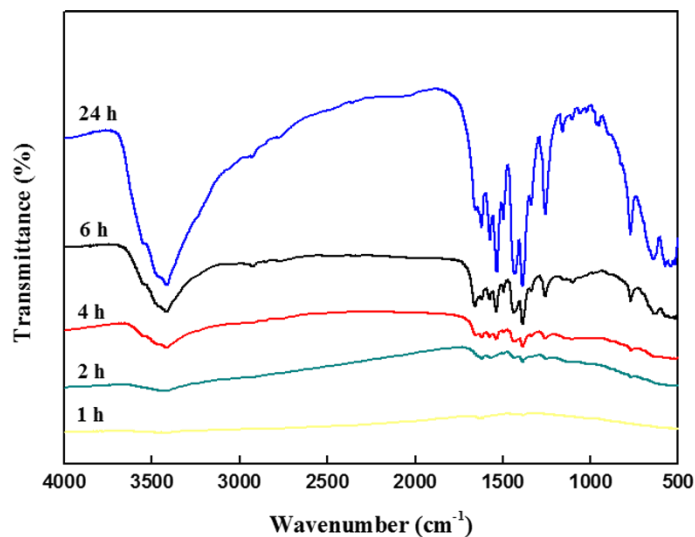

**Fig. S4** FT-IR spectra of NH<sub>2</sub>-MIL-125(Ti) crystals synthesized with NH<sub>2</sub>-BDC/TiS<sub>2</sub> molar ratio of 24 at 160 °C for different times.

The FT-IR spectra of prepared sample showed characteristic vibration peaks of NH<sub>2</sub>-MIL-125(Ti). To be specific, vibration bands located around 1600 and 1500 cm<sup>-1</sup> could be assigned to carbonyl asymmetric stretching vibrations, whereas vibration bands located at about 1440 and 1400 cm<sup>-1</sup> could be assigned to carbonyl symmetric stretching vibrations and vibration bands located at 1250 cm<sup>-1</sup> belonged to the C-H symmetric stretching vibrations of benzene ring.

SI-6 Investigation of the influence of synthetic temperature and duration on final morphology of NH<sub>2</sub>-MIL-125(Ti)

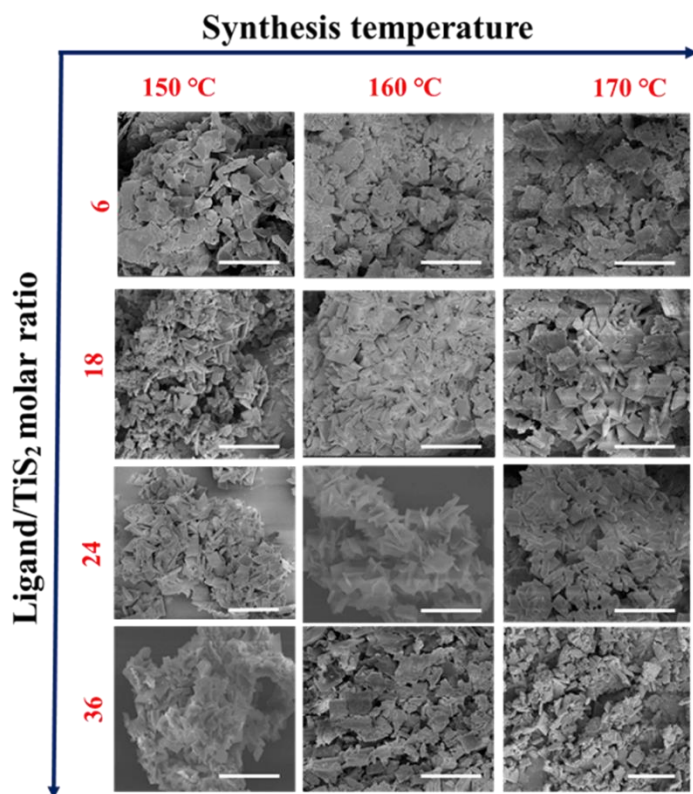

Fig. S5 SEM images of NH<sub>2</sub>-MIL-125(Ti) obtained with varied synthesis temperature and ligand/TiS<sub>2</sub> molar ratio (Indicated in the graph). The scale bar corresponded to 4  $\mu$  m.

## SI-7 Crystal structures and information of bond length

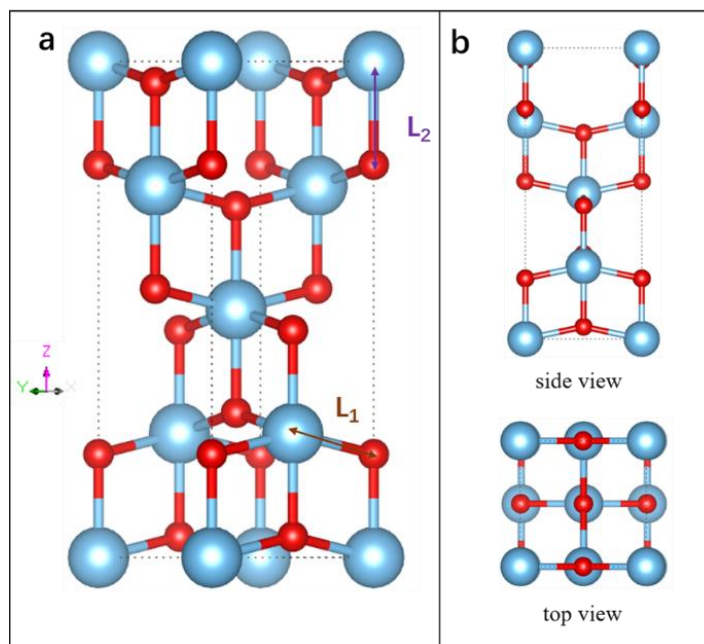

Fig. S6 a) Crystal structure of TiO<sub>2</sub>-anatase; b) TiO<sub>2</sub>-anatase (side and top view).

Table S4 Ti-O bond length of TiO<sub>2</sub>-anatase.

| Bond                      | Length (Å) |
|---------------------------|------------|
| O -- Ti (L <sub>1</sub> ) | 1.93       |
| O -- Ti (L <sub>2</sub> ) | 1.97       |



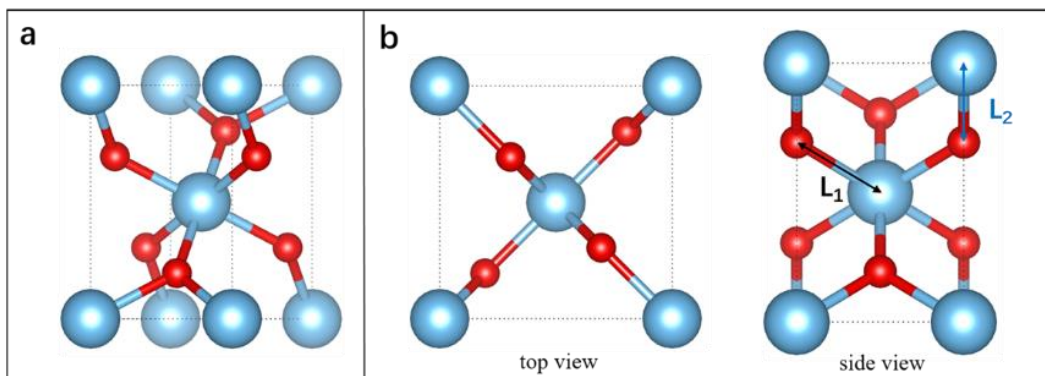

**Fig. S7** a) Crystal structure of TiO<sub>2</sub>-rutile; b) TiO<sub>2</sub>-rutile (side and top view).

**Table S5** Ti-O bond length of TiO<sub>2</sub>-rutile.

| Bond                      | Length (Å) |
|---------------------------|------------|
| O -- Ti (L <sub>1</sub> ) | 1.95       |
| O -- Ti (L <sub>2</sub> ) | 1.98       |

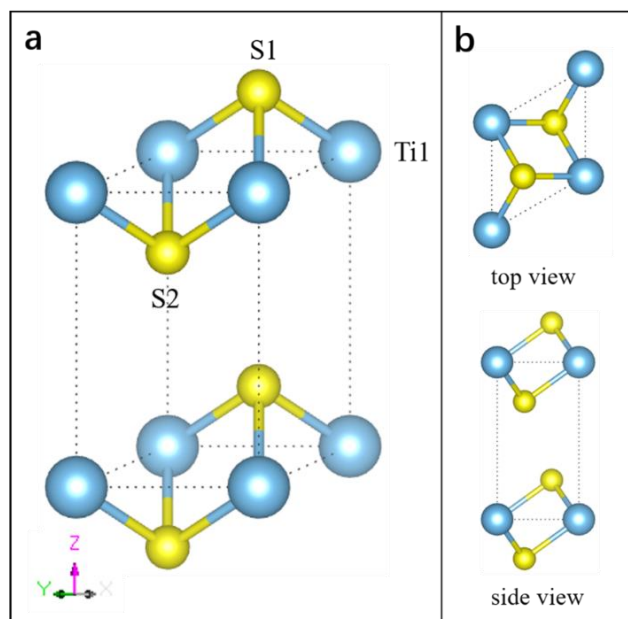

**Fig. S8** a) Crystal structure of TiS<sub>2</sub>; b) TiS<sub>2</sub> (side and top view).

**Table S6** Ti-S bond length of TiS<sub>2</sub>.

| Bond        | Length (Å) |
|-------------|------------|
| S 2 -- Ti 1 | 2.43       |
| S 1 -- Ti 1 | 2.43       |

### SI-8 Calculation methods of formation energies

All calculations were implemented in Vienna *ab Initio* Simulation Package (VASP) within the density functional theory (DFT). In order to characterize the stability of TiO<sub>2</sub> with TiS<sub>2</sub>, we defined their formation energy as follows:

$$E_{\text{formation}} = (xE_{\text{Ti}} + yE_{\text{M}} - E_{\text{Ti}_x\text{M}_y}) / (x + y) \quad (1)$$

where  $E_{\text{Ti}}$ ,  $E_{\text{M}}$ , and  $E_{\text{Ti}_x\text{M}_y}$  are energies of elemental titanium, O<sub>2</sub> molecule or elemental sulfur and bulk TiO<sub>2</sub> or bulk TiS<sub>2</sub> calculated from VASP, respectively.

**Table S7** The formation energies of TiO<sub>2</sub> and TiS<sub>2</sub>.

|                           | formation energy (eV) |
|---------------------------|-----------------------|
| TiO <sub>2</sub> _rutile  | 2.92                  |
| TiO <sub>2</sub> _anatase | 2.94                  |
| TiS <sub>2</sub> _layered | 1.24                  |

## SI-9 SEM and XRD characterization of prepared MIL-167 powders

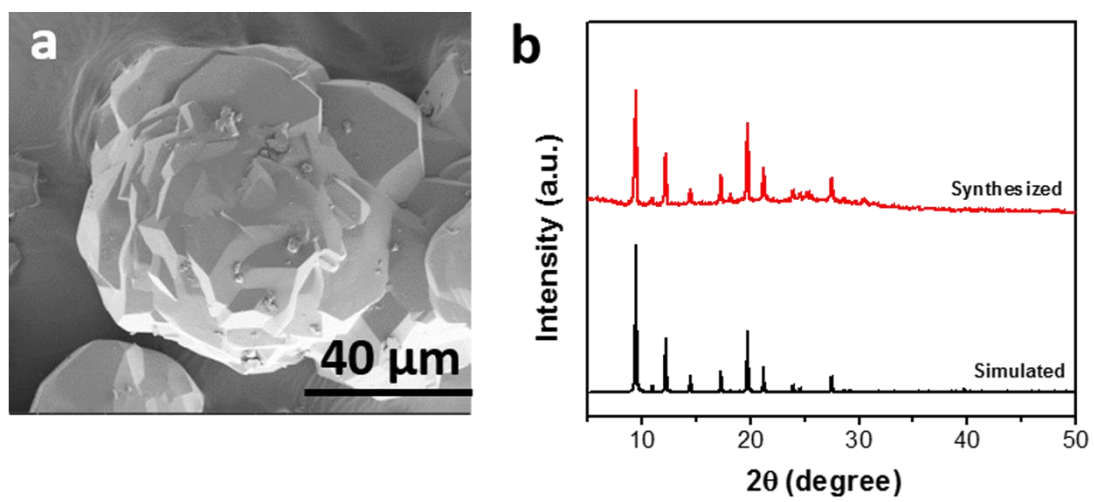

Fig. S9 SEM image a) and XRD pattern b) of MIL-167 derived from  $\text{TiS}_2$  precursors.
